# Supplementary material
Source: PubMed Central journal article supplement (PMC6909241)
Supplement: id9b00272_si_001.pdf [file id9b00272_si_001.pdf]

## Supporting Information

### HIV-1 nucleocapsid protein unfolds stable RNA G-quadruplexes in the viral genome and is inhibited by G-quadruplex ligands

Elena Butovskaya, Paola Soldà, Matteo Scalabrin, Matteo Nadai, Sara N. Richter\*

Department of Molecular Medicine, University of Padua, via Aristide Gabelli 63, 35121 Padua, Italy

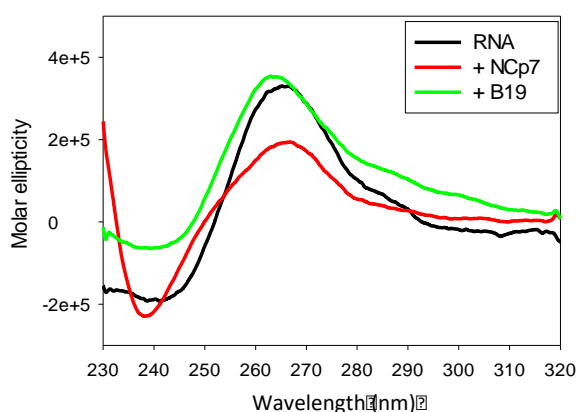

**Figure S1. CD analysis of NCp7-mediated U3 III+IV RNA G4 unfolding.** CD spectra of the G4-folded RNA U3 III+IV (black line) in the presence of 10-fold excess of NCp7 in 50 mM  $K^+$  or of the G4-ligand B19 (8  $\mu$ M).

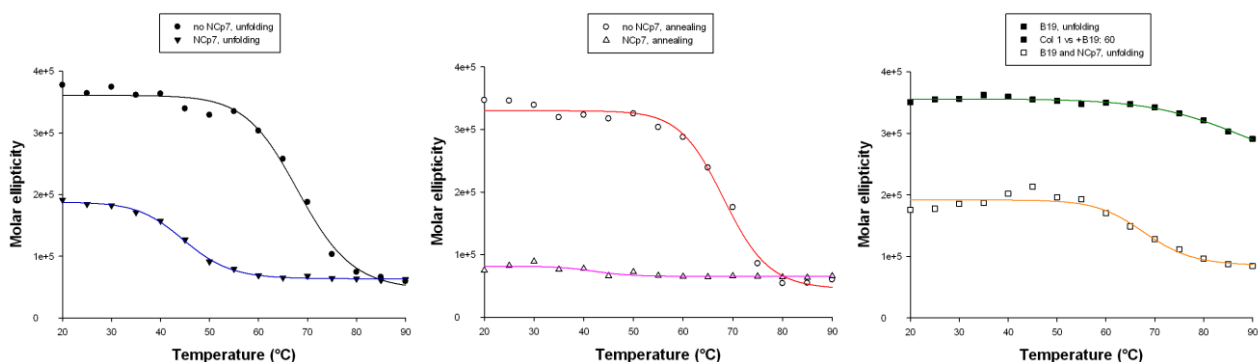

**Figure S2. CD melting/annealing analysis of NCp7-mediated U3 III+IV RNA G4 unfolding.** CD melting and annealing curves of the G4-folded RNA U3 III+IV (left panel) and in the presence of 10-fold excess of NCp7 in 50 mM  $K^+$  (middle panel). CD melting curves of the G4-folded RNA U3 III+IV in the presence of the G4-ligand B19 (8  $\mu$ M)

and in the presence of NCp7 (10x). The molar ellipticity at the peak wavelength (265 nm) is shown as a function of the temperature.
